# Supplementary material for: Analysing the Impacts of Financial Support for Regional Suicide Prevention Programmes on Suicide Mortality Caused by Major Suicide Motives in Japan Using Statistical Government Data
Source: MDPI journal article supplement (doi:10.3390/ijerph18073414), 2021-03-25
Supplement: s1 [file s1]

## Supplementary Tables

Supplementary tables indicate the statistical values regarding effects of EFECBSC sub-divisions on EBSMR trends of suicide mortalities caused by six major motives. When the data did not violate the ANOVA ( $p > 0.05$ ), any the values of forward multiple regression are not described. P values of excluded variables by forward multiple regression analysis are also not described.

**Supplementary Table S1.** Effects of the amounts of fund of EFECBSC sub-divisions on Male+Female, male and female EBSMR trends of suicide mortalities caused by health- related motive.

| <b>Health</b>                  | <b>Male+Female</b> |       | <b>Male</b> |       | <b>Female</b> |       |
|--------------------------------|--------------------|-------|-------------|-------|---------------|-------|
| Adjusted R <sup>2</sup>        | 0.087              |       | 0.150       |       | 0.086         |       |
| F value                        | 5.405              |       | 5.066       |       | 5.341         |       |
| P value                        | 0.025              |       | 0.010       |       | 0.025         |       |
|                                | $\beta$            | P     | $\beta$     | P     | B             | P     |
| Prefecture                     |                    |       |             |       |               |       |
| Personal consultation support  | 0.204              |       | 0.297       | 0.037 | -0.061        |       |
| Telephone consultation support | 0.128              |       | 0.105       |       | 0.084         |       |
| Development leaders/listeners  | 0.094              |       | -0.053      |       | 0.005         |       |
| Enlightenment                  | -0.125             |       | -0.145      |       | -0.153        |       |
| Intervention model             | -0.327             | 0.025 | -0.364      | 0.011 | -0.256        |       |
| Municipal                      |                    |       |             |       |               |       |
| Personal consultation support  | 0.056              |       | 0.021       |       | -0.077        |       |
| Telephone consultation support | 0.105              |       | 0.118       |       | 0.120         |       |
| Development leaders/listeners  | -0.185             |       | -0.114      |       | -0.326        | 0.025 |
| Enlightenment                  | -0.188             |       | -0.210      |       | -0.163        |       |
| Intervention model             | 0.028              |       | -0.008      |       | -0.087        |       |
| Complete unemployment rate     | 0.025              |       | 0.003       |       | 0.015         |       |

**Supplementary Table S2.** Effects of the amounts of fund of EFECBSC sub-divisions on Male+Female, male and female EBSMR trends of suicide mortalities caused by economy- related motive.

| <b>Economy</b>                 | <b>Male+Female</b> |       | <b>Male</b> |       | <b>Female</b> |   |
|--------------------------------|--------------------|-------|-------------|-------|---------------|---|
| Adjusted R <sup>2</sup>        | 0.104              |       | 0.108       |       |               |   |
| F value                        | 6.316              |       | 6.551       |       |               |   |
| P value                        | 0.016              |       | 0.014       |       |               |   |
|                                | $\beta$            | P     | $\beta$     | P     | B             | P |
| Prefecture                     |                    |       |             |       |               |   |
| Personal consultation support  | 0.196              |       | 0.181       |       | 0.174         |   |
| Telephone consultation support | 0.269              |       | 0.258       |       | 0.349         |   |
| Development leaders/listeners  | 0.161              |       | 0.139       |       | -0.041        |   |
| Enlightenment                  | -0.002             |       | -0.026      |       | -0.245        |   |
| Intervention model             | -0.351             | 0.016 | -0.356      | 0.014 | 0.019         |   |
| Municipal                      |                    |       |             |       |               |   |
| Personal consultation support  | -0.014             |       | -0.012      |       | -0.060        |   |
| Telephone consultation support | 0.036              |       | 0.049       |       | 0.020         |   |
| Development leaders/listeners  | -0.250             |       | -0.253      |       | -0.132        |   |
| Enlightenment                  | -0.170             |       | -0.197      |       | 0.158         |   |
| Intervention model             | -0.076             |       | -0.050      |       | -0.289        |   |
| Complete unemployment rate     | 0.183              |       | 0.194       |       | 0.223         |   |

**Supplementary Table S3.** Effects of the amounts of fund of EFECBSC sub-divisions on Male+Female, male and female EBSMR trends of suicide mortalities caused by family-related motive.

| <b>Family</b>                  | <b>Male+Female</b> |   | <b>Male</b> |   | <b>Female</b> |       |
|--------------------------------|--------------------|---|-------------|---|---------------|-------|
| Adjusted R <sup>2</sup>        |                    |   |             |   | 0.066         |       |
| F value                        |                    |   |             |   | 4.228         |       |
| P value                        |                    |   |             |   | 0.046         |       |
|                                | $\beta$            | P | $\beta$     | P | B             | P     |
| <b>Prefecture</b>              |                    |   |             |   |               |       |
| Personal consultation support  | 0.051              |   | 0.011       |   | 0.132         |       |
| Telephone consultation support | 0.243              |   | 0.213       |   | 0.293         | 0.046 |
| Development leaders/listeners  | 0.031              |   | -0.020      |   | 0.108         |       |
| Enlightenment                  | -0.012             |   | -0.091      |   | -0.041        |       |
| Intervention model             | -0.288             |   | -0.289      |   | 0.026         |       |
| <b>Municipal</b>               |                    |   |             |   |               |       |
| Personal consultation support  | 0.275              |   | 0.324       |   | 0.167         |       |
| Telephone consultation support | 0.064              |   | 0.095       |   | 0.057         |       |
| Development leaders/listeners  | -0.234             |   | -0.259      |   | 0.015         |       |
| Enlightenment                  | -0.050             |   | -0.001      |   | -0.014        |       |
| Intervention model             | -0.017             |   | -0.105      |   | 0.020         |       |
| Complete unemployment rate     | -0.180             |   | -0.062      |   | -0.216        |       |

**Supplementary Table S4.** Effects of the amounts of fund of EFECBSC sub-divisions on Male+Female, male and female EBSMR trends of suicide mortalities caused by school-related motive.

| <b>School</b>                  | <b>Male+Female</b> |   | <b>Male</b> |   | <b>Female</b> |       |
|--------------------------------|--------------------|---|-------------|---|---------------|-------|
| Adjusted R <sup>2</sup>        |                    |   |             |   | 0.063         |       |
| F value                        |                    |   |             |   | 4.117         |       |
| P value                        |                    |   |             |   | 0.048         |       |
|                                | $\beta$            | P | $\beta$     | P | B             | P     |
| <b>Prefecture</b>              |                    |   |             |   |               |       |
| Personal consultation support  | 0.196              |   | 0.113       |   | 0.105         |       |
| Telephone consultation support | -0.066             |   | -0.123      |   | 0.123         |       |
| Development leaders/listeners  | -0.226             |   | -0.100      |   | -0.063        |       |
| Enlightenment                  | -0.213             |   | -0.243      |   | 0.001         |       |
| Intervention model             | -0.079             |   | -0.150      |   | -0.081        |       |
| <b>Municipal</b>               |                    |   |             |   |               |       |
| Personal consultation support  | 0.049              |   | 0.061       |   | 0.053         |       |
| Telephone consultation support | 0.144              |   | 0.060       |   | 0.290         | 0.048 |
| Development leaders/listeners  | 0.016              |   | -0.122      |   | -0.012        |       |
| Enlightenment                  | 0.455              |   | 0.503       |   | 0.077         |       |
| Intervention model             | -0.352             |   | -0.147      |   | -0.026        |       |
| Complete unemployment rate     | 0.108              |   | 0.023       |   | 0.116         |       |

**Supplementary Table S5.** Effects of the funding amounts of EFECBSC sub-divisions on Male+Female, male and female EBSMR trends of suicide mortalities of school-aged population (total).

| <b>School-aged population (total)</b> | <b>Male+Female</b> |       | <b>Male</b> |       | <b>Female</b> |       |
|---------------------------------------|--------------------|-------|-------------|-------|---------------|-------|
| Adjusted R <sup>2</sup>               | 0.167              |       | 0.109       |       | 0.306         |       |
| F value                               | 5.625              |       | 6.600       |       | 5.766         |       |
| P value                               | 0.007              |       | 0.014       |       | 0.021         |       |
|                                       | $\beta$            | P     | $\beta$     | P     | B             | P     |
| <b>Prefecture</b>                     |                    |       |             |       |               |       |
| Personal consultation support         | 0.080              |       | -0.108      |       | 0.375         | 0.004 |
| Telephone consultation support        | -0.212             |       | -0.132      |       | -0.094        |       |
| Development leaders/listeners         | -0.344             | 0.014 | -0.262      |       | 0.152         |       |
| Enlightenment                         | -0.190             |       | -0.358      | 0.014 | 0.304         | 0.021 |
| Intervention model                    | -0.088             |       | -0.137      |       | 0.115         |       |
| <b>Municipal</b>                      |                    |       |             |       |               |       |
| Personal consultation support         | 0.097              |       | -0.082      |       | 0.053         |       |
| Telephone consultation support        | 0.035              |       | 0.107       |       | 0.321         | 0.014 |
| Development leaders/listeners         | 0.065              |       | 0.033       |       | 0.025         |       |
| Enlightenment                         | -0.116             |       | -0.046      |       | -0.302        |       |
| Intervention model                    | -0.301             | 0.030 | -0.218      |       | -0.145        |       |
| Complete unemployment rate            | 0.194              |       | -0.027      |       | 0.207         |       |

**Supplementary Table S6.** Effects of the funding amounts of EFECBSC sub-divisions on Male+Female, male and female EBSMR trends of suicide mortalities caused by school-related motive of school-aged population (school-related motive).

| <b>School-aged population (school-related motive)</b> | <b>Male+Female</b> |   | <b>Male</b> |   | <b>Female</b> |       |
|-------------------------------------------------------|--------------------|---|-------------|---|---------------|-------|
| Adjusted R <sup>2</sup>                               |                    |   |             |   | 0.071         |       |
| F value                                               |                    |   |             |   | 4.517         |       |
| P value                                               |                    |   |             |   | 0.039         |       |
|                                                       | $\beta$            | P | $\beta$     | P | B             | P     |
| <b>Prefecture</b>                                     |                    |   |             |   |               |       |
| Personal consultation support                         | 0.240              |   | 0.140       |   | 0.131         |       |
| Telephone consultation support                        | -0.090             |   | -0.130      |   | 0.142         |       |
| Development leaders/listeners                         | -0.171             |   | -0.115      |   | -0.048        |       |
| Enlightenment                                         | -0.199             |   | -0.252      |   | 0.020         |       |
| Intervention model                                    | -0.097             |   | -0.123      |   | -0.050        |       |
| <b>Municipal</b>                                      |                    |   |             |   |               |       |
| Personal consultation support                         | 0.005              |   | 0.072       |   | 0.069         |       |
| Telephone consultation support                        | 0.175              |   | 0.065       |   | 0.302         | 0.039 |
| Development leaders/listeners                         | -0.028             |   | -0.135      |   | -0.021        |       |
| Enlightenment                                         | 0.481              |   | 0.523       |   | 0.086         |       |
| Intervention model                                    | -0.290             |   | -0.163      |   | -0.009        |       |
| Complete unemployment rate                            | 0.041              |   | 0.019       |   | 0.121         |       |
